# Supplementary material for: Myocardial Injury as a Prognostic Factor in Mid- and Long-Term Follow-Up of COVID-19 Survivors
Source: J Clin Med. 2021 Dec 16;10(24):5900. doi: 10.3390/jcm10245900 (PMC8708676; doi:10.3390/jcm10245900)
Supplement: Supplementary file 1 [file jcm-10-05900-s001.zip › jcm-1505384-supplementary.pdf]

**Table S1. Baseline characteristics in patients re-examined and those not re-examined at six months.**

|                                                          | <b>Patients re-examined<br/>(n = 86)</b> | <b>Patients not re-examined<br/>(n = 86)</b> | <b>p-value</b> |
|----------------------------------------------------------|------------------------------------------|----------------------------------------------|----------------|
| <b>Age, years*</b>                                       | 69.0 (65.0–73.8)                         | 67.0 (54.0–75.5)                             | 0.387          |
| <b>Women</b>                                             | 26.7%                                    | 36.4%                                        | 0.306          |
| <b>Hypertension</b>                                      | 55.8%                                    | 67.4%                                        | 0.157          |
| <b>Dyslipidemia</b>                                      | 39.5%                                    | 36.0%                                        | 0.753          |
| <b>Ever smoked</b>                                       | 30.5%                                    | 28.9%                                        | 0.960          |
| <b>Diabetes mellitus</b>                                 | 18.6%                                    | 29.4%                                        | 0.140          |
| <b>Chronic kidney disease</b>                            | 4.65%                                    | 8.24%                                        | 0.520          |
| <b>Chronic heart failure</b>                             | 3.49%                                    | 6.98%                                        | 0.496          |
| <b>Coronary heart disease</b>                            | 6.98%                                    | 11.6%                                        | 0.431          |
| <b>Atrial fibrillation</b>                               | 11.6%                                    | 5.95%                                        | 0.301          |
| <b>COPD</b>                                              | 10.5%                                    | 11.6%                                        | 1.000          |
| <b>Cerebrovascular disease</b>                           | 3.53%                                    | 4.65%                                        | 1.000          |
| <b>Peripheral vascular disease</b>                       | 3.49%                                    | 5.81%                                        | 0.720          |
| <b>Leukocytes/<math>\mu\text{L} \times 10^3</math>*</b>  | 6.40 (5.25–8.2)                          | 7.11 (5.55–8.85)                             | 0.366          |
| <b>Lymphocytes/<math>\mu\text{L} \times 10^3</math>*</b> | 0.90 (0.68–1.17)                         | 1.08 (0.67–1.36)                             | 0.201          |
| <b>Hemoglobin, g/dL**</b>                                | 14.0 (1.54)                              | 13.1 (1.88)                                  | 0.001          |
| <b>Creatinine, mg/dL*</b>                                | 0.95 (0.78–1.16)                         | 0.82 (0.69–1.02)                             | 0.014          |
| <b>LDH U/L*</b>                                          | 316 (256–393)                            | 291 (244–390)                                | 0.352          |
| <b>C-reactive protein, mg/dL*</b>                        | 8.70 (3.9–13.5)                          | 8.75 (4.0–17.2)                              | 0.411          |
| <b>D-Dimer, ng/mL*</b>                                   | 670 (460–1190)                           | 880 (520–2050)                               | 0.085          |

\*Median (inter-quartile range); \*\*Mean (standard deviation); COPD, Chronic Obstructive Pulmonary Disease; LDH, lactate dehydrogenase.
